# Supplementary material for: The structure and electronic effects of ZIF-8 and ZIF-67 supported Pt catalysts for crotonaldehyde selective hydrogenation
Source: Royal Society of Chemistry journal article supplement (doi:10.1039/d1nj05487b), 2022-01-01
Supplement: d1nj05487b1.pdf [file d1nj05487b1.pdf]

## Supporting information

### The structure and electronic effects of ZIF-8 and ZIF-67 supported Pt catalysts for crotonaldehyde selective hydrogenation

Haiyu Shen,<sup>a,b</sup> Huahua Zhao,<sup>a</sup> Jian Yang,<sup>a</sup> Jun Zhao,<sup>a</sup> Liang Yan,<sup>a</sup> Lingjun Chou,<sup>\*a</sup> Huanling Song,<sup>\*a</sup>

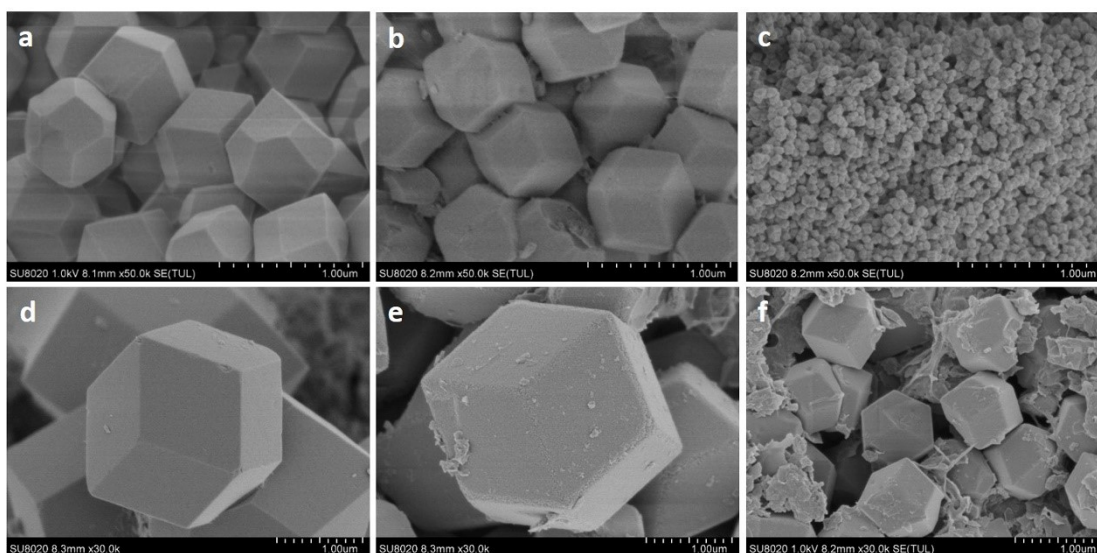

**Fig. S1.** SEM images of (a) ZIF-8, (b) Pt/ZIF-8, (c) Pt@ZIF-8, (d) ZIF-67, (e) Pt/ZIF-67, (f) Pt@ZIF-67.

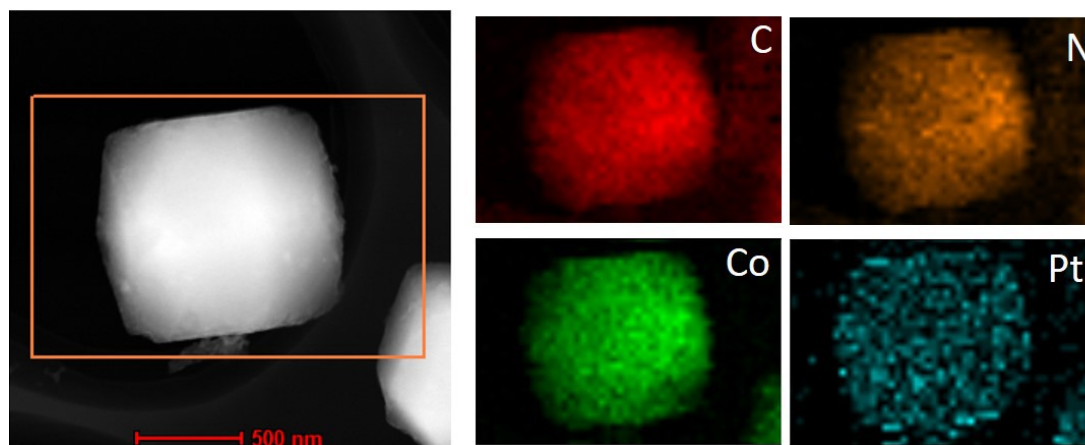

**Fig. S2.** Elemental mapping of single Pt/ZIF-67 obtained by high-angle annular dark-field scanning transmission (HAADF-STEM).

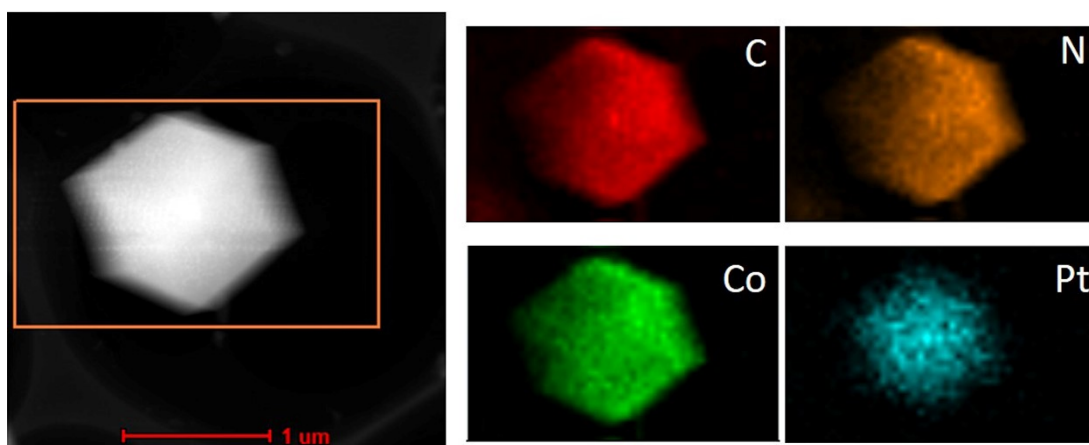

Fig. S3. Elemental mapping of single Pt@ZIF-67 obtained by HAADF-STEM.

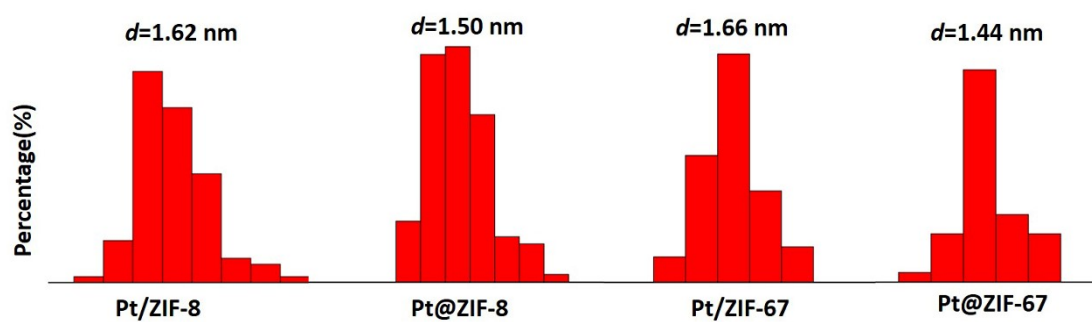

Fig. S4. Size histogram Pt particles in different catalysts.

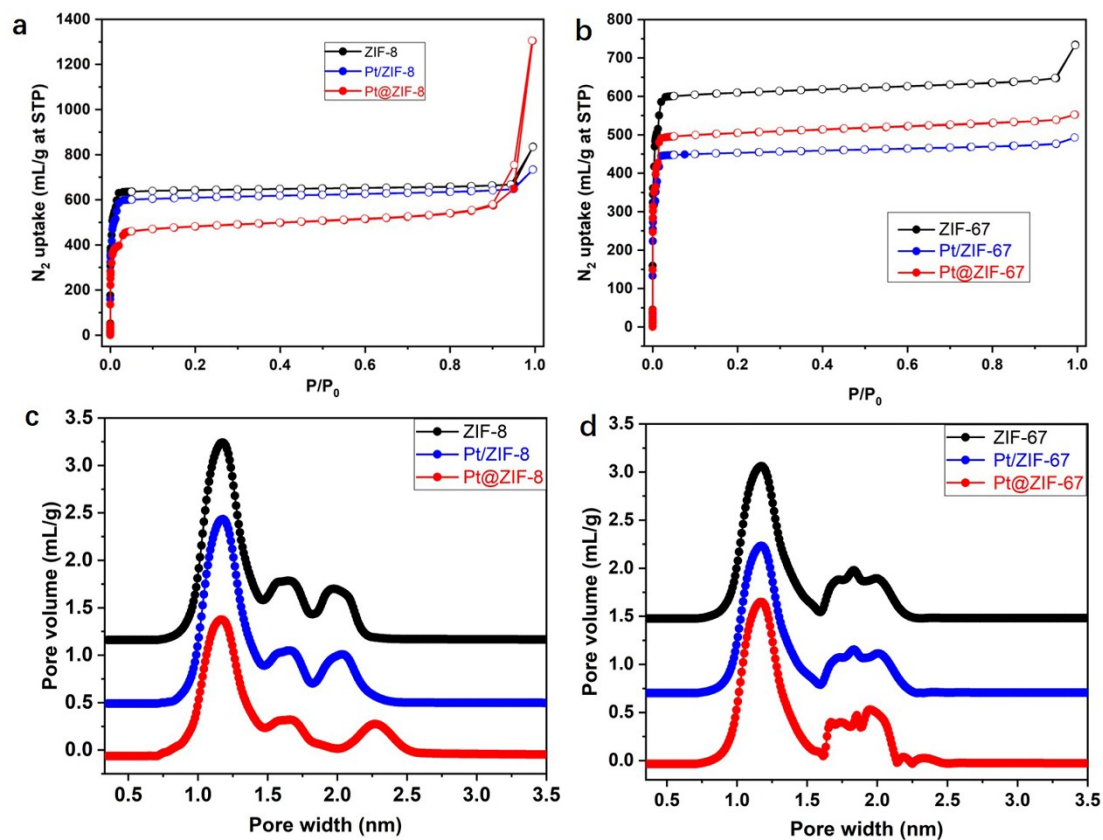

**Fig. S5.** The (a) (b) N<sub>2</sub> physisorption isotherms and (c) (d) pore size distributions of ZIF-8, Pt/ZIF-8, Pt@ZIF-8, ZIF-67, Pt/ZIF-67 and Pt@ZIF-67 catalysts.

**WO<sub>3</sub>+Pt@ZIF-67**

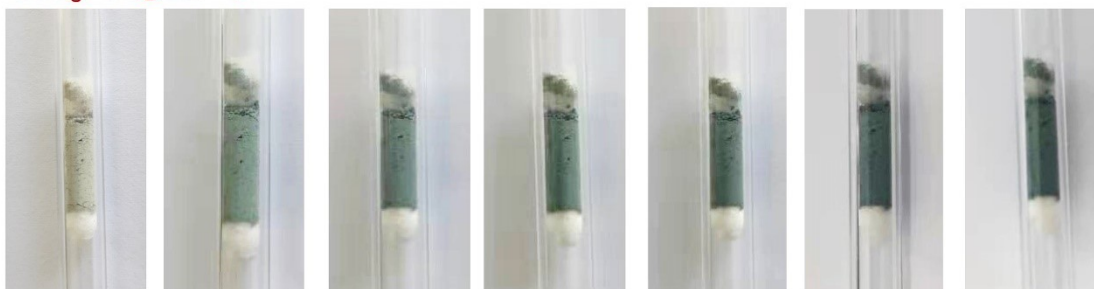

**WO<sub>3</sub>+Pt@ZIF-8**

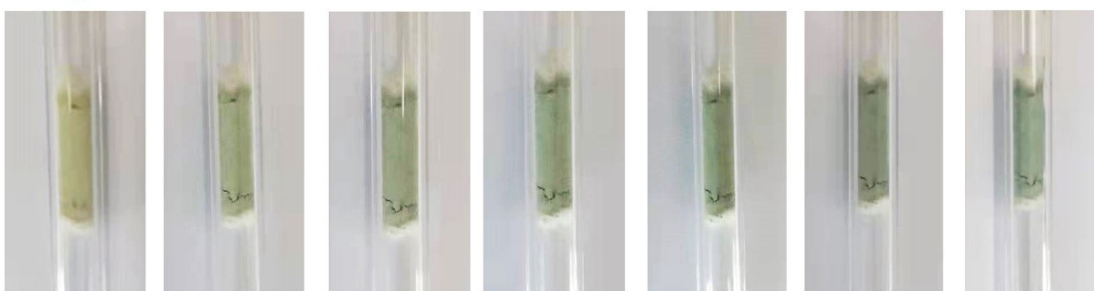

**WO<sub>3</sub>+Pt/ZIF-67**

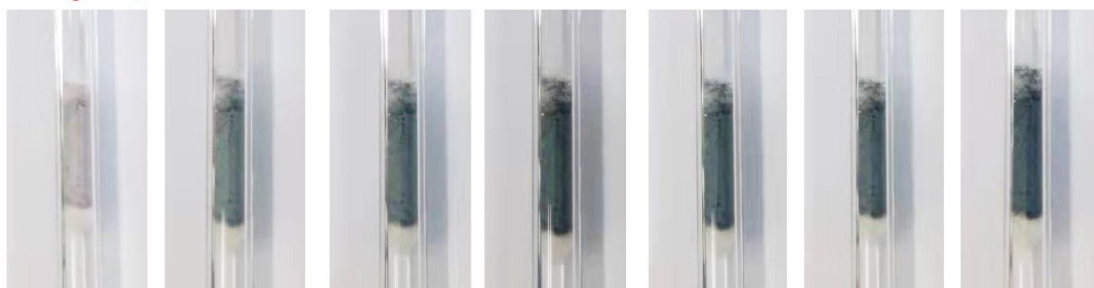

**WO<sub>3</sub>+Pt/ZIF-8**

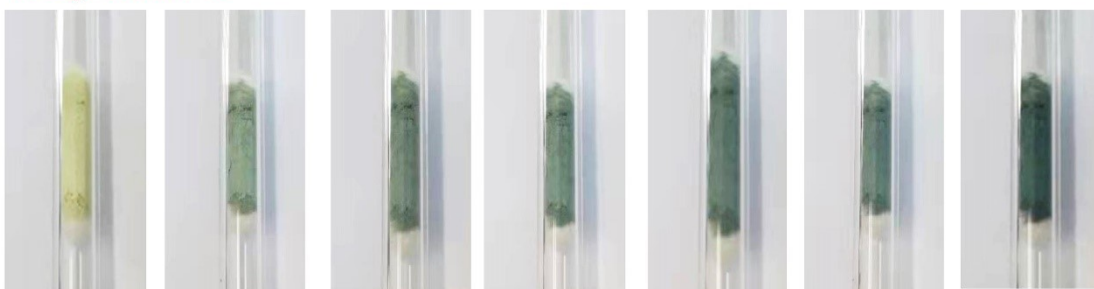

0 min

1 min

2 min

3 min

4 min

5 min

10 min

**Fig. S6.** Photographs of color changes over time of samples made with 1 g WO<sub>3</sub> mixed with 0.02 g various catalysts after treatment with H<sub>2</sub> at 25 °C for 10 min.

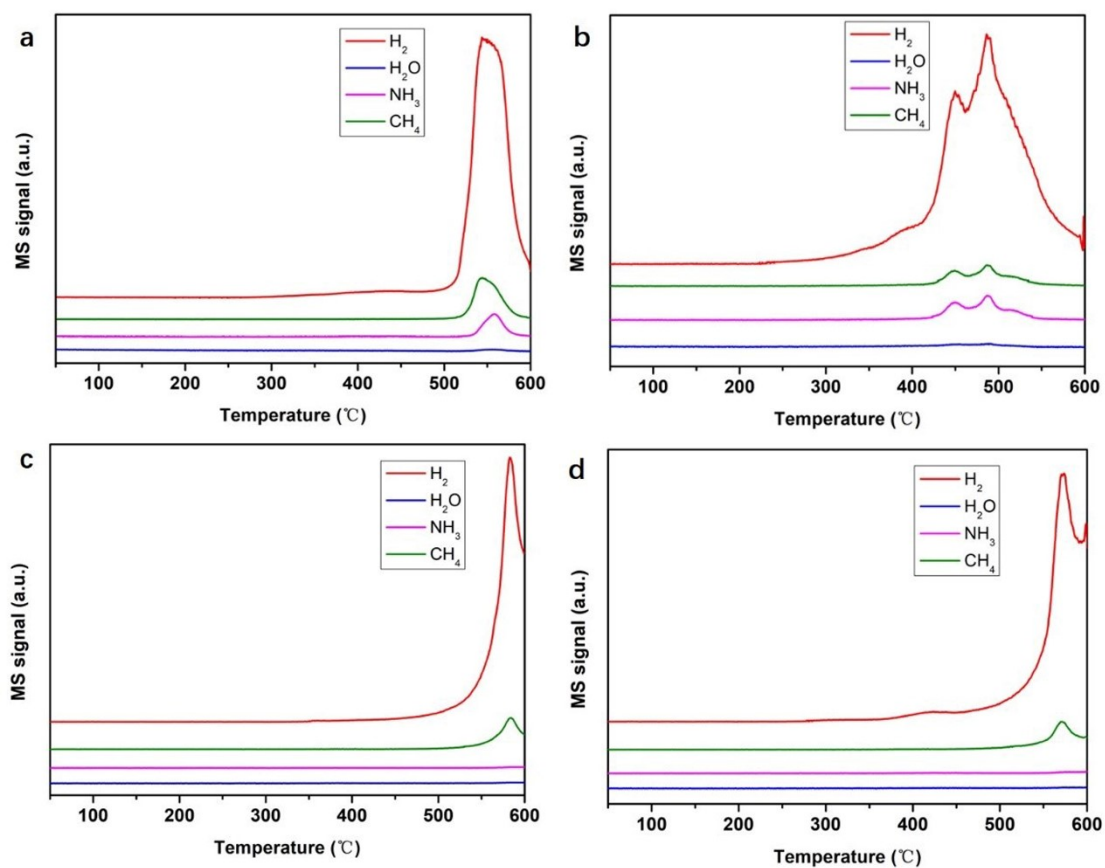

Fig. S7. TPD-MS profiles with temperature of (a) Pt/ZIF-67, (b) Pt@ZIF-67, (c) Pt/ZIF-8 and (d) Pt@ZIF-8 sample under H<sub>2</sub>/N<sub>2</sub> stream.

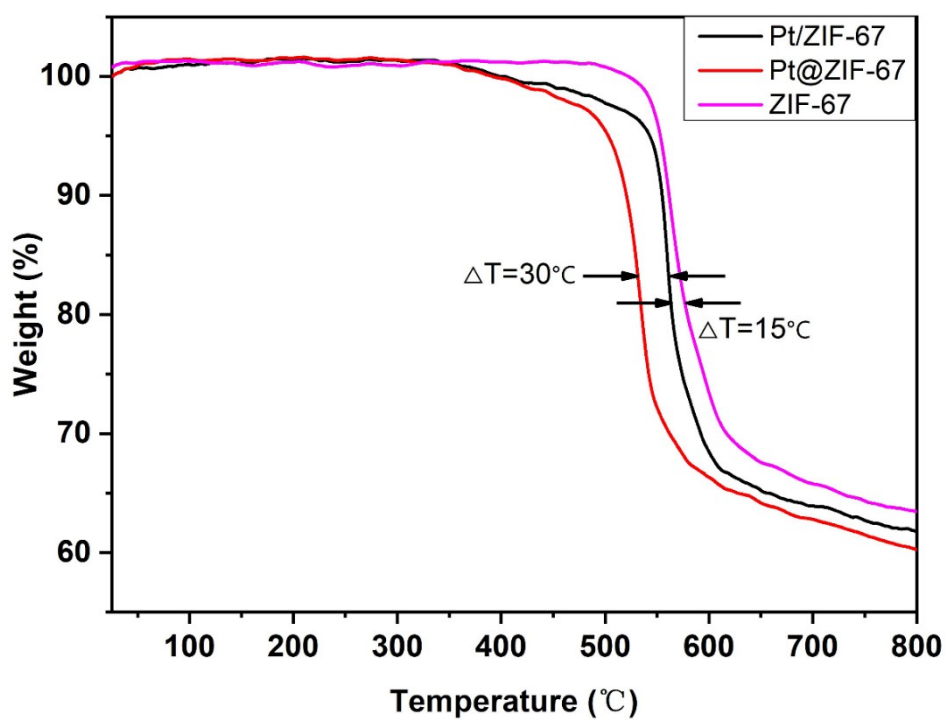

Fig. S8. TGA results obtained from ZIF-67, Pt/ZIF-67 and Pt@ZIF-67.

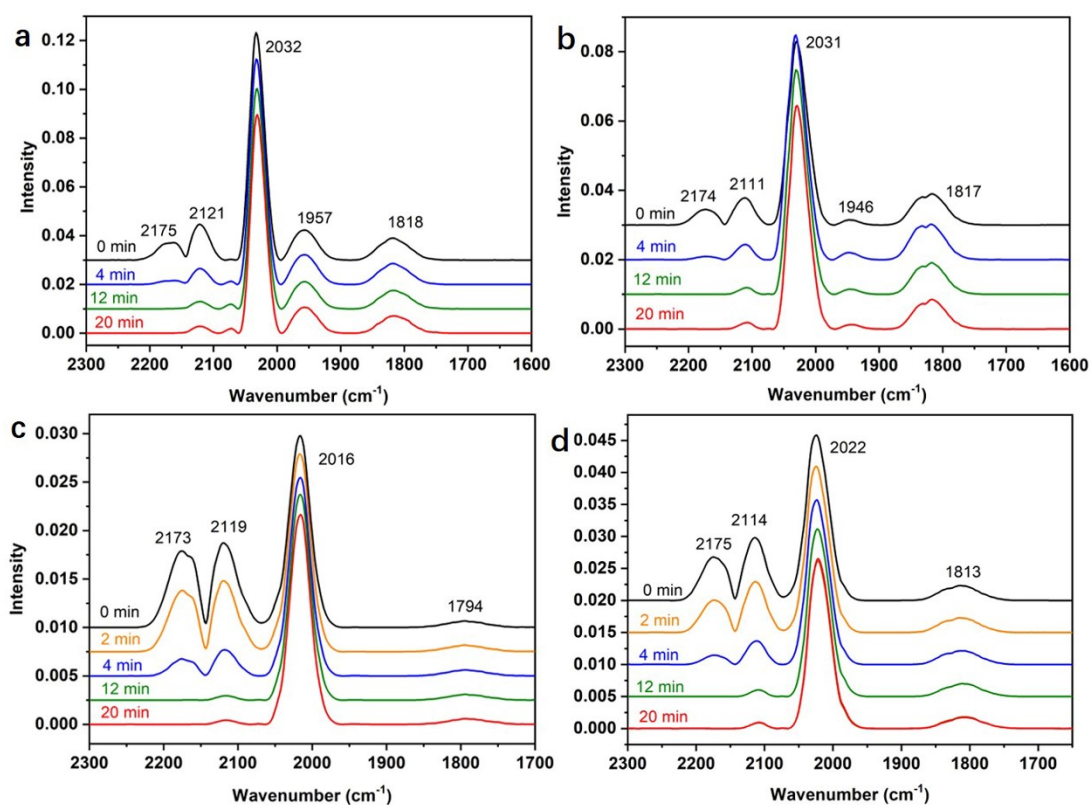

Fig. S9. In situ DRIFT spectra of CO adsorption at 40 °C on (a) Pt@ZIF-8, (b) Pt@ZIF-67, (c) Pt/ZIF-8, (d) Pt/ZIF-67 after different evacuation time.

*(The e, f images in the original manuscript is removed)*

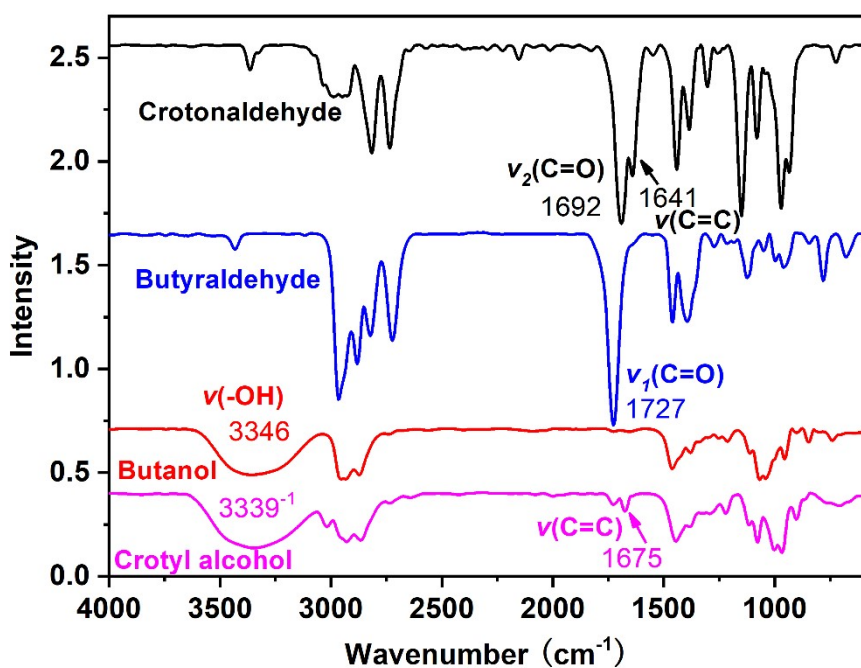

Fig. S10. IR spectra crotonaldehyde, butyraldehyde, 1-butanol, crotyl alcohol

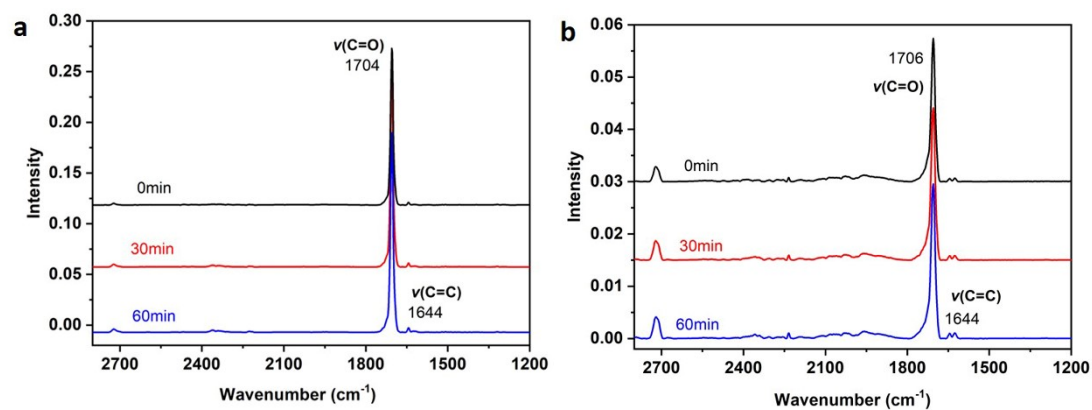

**Fig. S11.** In situ DRIFT spectra of hydrogenation of crotonaldehyde over (a) ZIF-8, (b) ZIF-67.

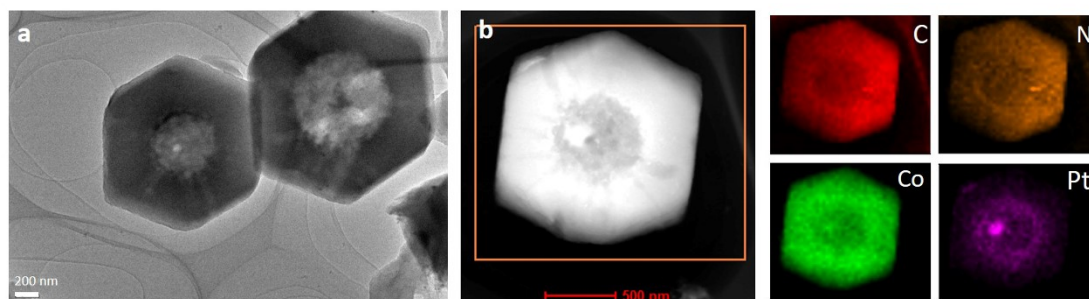

**Fig. S12.** (a) TEM and (b) HAADF-STEM elemental mapping of single Pt@ZIF-67 after 6 cycles catalytic reaction.

**Table S1.** The BET surface area and pore volume of catalysts.

| Catalysts | BET surface area (m <sup>2</sup> /g) | Pore volume (cm <sup>3</sup> /g) |
|-----------|--------------------------------------|----------------------------------|
| ZIF-8     | 1966.2                               | 1.289                            |
| Pt/ZIF-8  | 1871.5                               | 1.136                            |
| Pt@ZIF-8  | 1490.7                               | 1.004                            |
| ZIF-67    | 1432.8                               | 0.775                            |
| Pt/ZIF-67 | 1390.9                               | 0.762                            |
| Pt@ZIF-67 | 1551.9                               | 0.854                            |

**Table S2.** Crotonaldehyde hydrogenation results and characterization on the various catalysts.

| <b>Catalysts <sup>a</sup></b>     | <b>Conversion (%)</b> | <b>Selectivity <sup>b</sup> (%)</b> | <b>Time (h)</b> | <b>TOF (h<sup>-1</sup>)</b> | <b>Pt loading <sup>c</sup> (%)</b> |
|-----------------------------------|-----------------------|-------------------------------------|-----------------|-----------------------------|------------------------------------|
| ZIF-8                             | 0                     | 0                                   | 1               | 0                           | 0                                  |
| ZIF-67                            | 0                     | 0                                   | 1               | 0                           | 0                                  |
| Pt/ZIF-8                          | 0.9                   | 0                                   | 1               | 22.26                       | 1.0                                |
| Pt/ZIF-67                         | 14                    | 36.8                                | 1               | 318.8                       | 1.0                                |
| Pt@ZIF-8                          | 7.3                   | 0                                   | 4               | 7.46                        | 2.9                                |
| Pt@ZIF-67                         | 25.6                  | 51.5                                | 1               | 188.3                       | 3.2 (2.8 <sup>d</sup> )            |
| Pt/ZnO                            | 2.2                   | 27.7                                | 1               | 59.48                       | 0.9                                |
| Pt/Co <sub>3</sub> O <sub>4</sub> | 11.6                  | 43.6                                | 1               | 306.33                      | 0.9                                |

<sup>a</sup> Reaction condition: 2 MPa, 70 °C, 0.05 g catalysts, 0.5 mL crotonaldehyde, 25 mL ethanol.

<sup>b</sup> The selectivity of crotyl alcohol.

<sup>c</sup> Accurate Pt loading determined by ICP analysis.

<sup>d</sup> Pt content after 6 cycles reaction.
